# Supplementary material
Source: Springer Nature journal article supplement (https://www.springermedizin.de/resource/supplementary/12960_2003_12_MOESM7_ESM.pdf/9569728)
Supplement: MOESM7 [file 9569728]

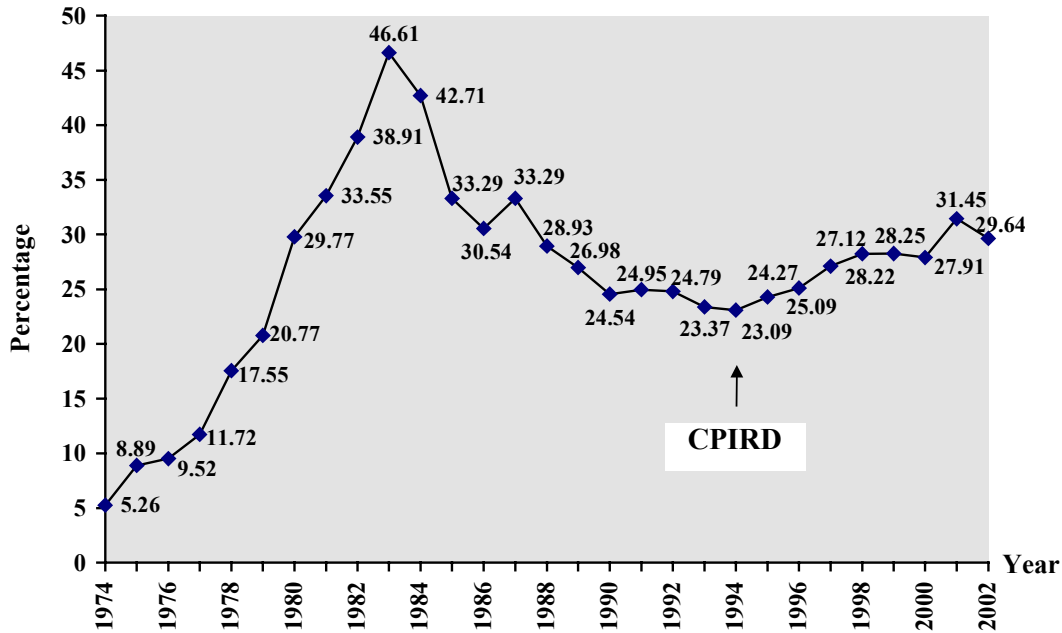

CPIRD = Collaborative Project to Increase Production of Rural Doctors

Source: Faculty of Medicine of all universities
